# Supplementary material for: Measurement report: Occurrence of aminiums in PM 2.5 during winter in China – aminium outbreak during polluted episodes and potential constraints
Source: Copernicus journal article supplement (doi:10.5194/acp-24-10531-2024), 2024-09-23
Supplement: Supplementary file 1 [file acp-24-10531-2024-supplement.pdf]

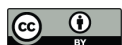

*Supplement of*

**Measurement report: Occurrence of aminiums in PM<sub>2.5</sub> during winter in China – aminium outbreak during polluted episodes and potential constraints**

**Yu Xu et al.**

*Correspondence to:* Hua-Yun Xiao ([xiaohuayun@sjtu.edu.cn](mailto:xiaohuayun@sjtu.edu.cn))

The copyright of individual parts of the supplement might differ from the article licence.

**Contents of this file**

Tables S1–S4

Figures S1–S5

**Table S1.** Mean values ( $\pm$  SD) of the main parameters observed in different periods and locations.

| Parameters                                                                                                               | Lanzhou (LZ)                              |                     |                     | Taiyuan (TY)                              |                                             |                                             | Haerbin (HEB)                                            |                     |                                             | Beijing (BJ)                                             |                     |                     |
|--------------------------------------------------------------------------------------------------------------------------|-------------------------------------------|---------------------|---------------------|-------------------------------------------|---------------------------------------------|---------------------------------------------|----------------------------------------------------------|---------------------|---------------------------------------------|----------------------------------------------------------|---------------------|---------------------|
|                                                                                                                          | Dec. 2–30, 2017 ( $n = 17$ ) <sup>a</sup> |                     |                     | Dec. 2–30, 2017 ( $n = 15$ ) <sup>a</sup> |                                             |                                             | Dec. 18, 2017 to Jan. 15, 2018 ( $n = 17$ ) <sup>a</sup> |                     |                                             | Dec. 22, 2017 to Jan. 21, 2018 ( $n = 18$ ) <sup>a</sup> |                     |                     |
|                                                                                                                          | Clean day                                 | Polluted day        | Full period         | Clean day                                 | Polluted day                                | Full period                                 | Clean day                                                | Polluted day        | Full period                                 | Clean day                                                | Polluted day        | Full period         |
| PM <sub>2.5</sub> ( $\mu\text{g m}^{-3}$ )                                                                               | 52.33 $\pm$ 13.40                         | 111.75 $\pm$ 19.17  | 80.29 $\pm$ 33.87   | 32.50 $\pm$ 11.37                         | 135.43 $\pm$ 44.91                          | 80.53 $\pm$ 60.39                           | 41.60 $\pm$ 17.35                                        | 133.00 $\pm$ 45.60  | 106.12 $\pm$ 57.36                          | 34.00 $\pm$ 13.90                                        | 115.40 $\pm$ 32.40  | 56.61 $\pm$ 41.90   |
| T ( $^{\circ}\text{C}$ )                                                                                                 | -5.25 $\pm$ 1.72                          | -4.99 $\pm$ 1.10    | -5.13 $\pm$ 1.47    | -4.14 $\pm$ 3.77                          | -3.82 $\pm$ 4.70                            | -3.99 $\pm$ 4.23                            | -12.63 $\pm$ 3.27                                        | -15.43 $\pm$ 3.10   | -14.61 $\pm$ 3.40                           | -6.68 $\pm$ 2.51                                         | -2.68 $\pm$ 3.83    | -3.79 $\pm$ 3.94    |
| RH (%)                                                                                                                   | 52.69 $\pm$ 4.87                          | 53.58 $\pm$ 8.34    | 53.11 $\pm$ 6.74    | 55.45 $\pm$ 2.46                          | 54.86 $\pm$ 13.53                           | 44.51 $\pm$ 13.50                           | 65.78 $\pm$ 4.06                                         | 69.56 $\pm$ 6.16    | 68.45 $\pm$ 5.88                            | 40.43 $\pm$ 5.78                                         | 70.58 $\pm$ 14.07   | 48.80 $\pm$ 16.17   |
| Wind speed ( $\text{m s}^{-1}$ )                                                                                         | 1.64 $\pm$ 0.33                           | 1.63 $\pm$ 0.52     | 1.63 $\pm$ 0.43     | 2.64 $\pm$ 0.62                           | 1.57 $\pm$ 0.71                             | 2.14 $\pm$ 0.85                             | 2.68 $\pm$ 0.56                                          | 2.36 $\pm$ 0.68     | 2.45 $\pm$ 0.67                             | 2.35 $\pm$ 0.94                                          | 1.65 $\pm$ 0.50     | 2.16 $\pm$ 0.90     |
| VC <sup>b</sup> ( $\text{m}^2 \text{s}^{-1}$ )                                                                           | 434.06 $\pm$ 270.98                       | 337.49 $\pm$ 201.57 | 388.61 $\pm$ 245.60 | 1632.49 $\pm$ 951.06                      | 352.14 $\pm$ 247.19                         | 1034.99 $\pm$ 958.60                        | 1253.71 $\pm$ 581.83                                     | 553.49 $\pm$ 268.89 | 759.44 $\pm$ 502.39                         | 760.26 $\pm$ 960.35                                      | 394.85 $\pm$ 367.63 | 658.76 $\pm$ 854.64 |
| PBLH (m)                                                                                                                 | 250.25 $\pm$ 105.49                       | 193.81 $\pm$ 63.06  | 223.69 $\pm$ 92.50  | 571.91 $\pm$ 238.95                       | 212.74 $\pm$ 80.36                          | 404.29 $\pm$ 256.07                         | 452.36 $\pm$ 180.19                                      | 225.09 $\pm$ 75.03  | 291.94 $\pm$ 155.71                         | 268.58 $\pm$ 157.05                                      | 205.93 $\pm$ 119.69 | 251.18 $\pm$ 150.27 |
| Amount of rainfall (mm)                                                                                                  | 0.00 $\pm$ 0.00                           | 0.00 $\pm$ 0.00     | 0.00 $\pm$ 0.00     | 0.00 $\pm$ 0.00                           | 0.07 $\pm$ 0.17<br>( $n = 1$ ) <sup>c</sup> | 0.03 $\pm$ 0.12<br>( $n = 1$ ) <sup>c</sup> | 0.04 $\pm$ 0.08<br>( $n = 1$ ) <sup>c</sup>              | 0.00 $\pm$ 0.00     | 0.01 $\pm$ 0.05<br>( $n = 1$ ) <sup>c</sup> | 0.00 $\pm$ 0.00                                          | 0.00 $\pm$ 0.00     | 0.00 $\pm$ 0.00     |
| SO <sub>2</sub> ( $\mu\text{g m}^{-3}$ )                                                                                 | 44.56 $\pm$ 11.27                         | 68.38 $\pm$ 26.58   | 55.76 $\pm$ 23.26   | 33.75 $\pm$ 23.36                         | 100.43 $\pm$ 18.31                          | 64.87 $\pm$ 39.42                           | 38.00 $\pm$ 8.29                                         | 62.25 $\pm$ 13.91   | 55.12 $\pm$ 16.70                           | 9.08 $\pm$ 3.69                                          | 10.00 $\pm$ 3.90    | 9.33 $\pm$ 3.77     |
| NO <sub>2</sub> ( $\mu\text{g m}^{-3}$ )                                                                                 | 72.56 $\pm$ 16.67                         | 100.63 $\pm$ 22.64  | 85.76 $\pm$ 24.18   | 38.00 $\pm$ 11.65                         | 86.43 $\pm$ 11.10                           | 60.60 $\pm$ 26.71                           | 34.80 $\pm$ 7.98                                         | 60.42 $\pm$ 11.77   | 52.88 $\pm$ 15.90                           | 49.62 $\pm$ 14.45                                        | 73.60 $\pm$ 8.21    | 56.83 $\pm$ 17.25   |
| O <sub>3</sub> ( $\mu\text{g m}^{-3}$ )                                                                                  | 55.44 $\pm$ 11.53                         | 50.00 $\pm$ 8.66    | 52.88 $\pm$ 10.63   | 64.63 $\pm$ 12.19                         | 23.43 $\pm$ 10.63                           | 45.40 $\pm$ 23.55                           | 54.80 $\pm$ 1.94                                         | 39.08 $\pm$ 8.72    | 43.71 $\pm$ 10.30                           | 37.92 $\pm$ 15.31                                        | 22.80 $\pm$ 14.84   | 33.72 $\pm$ 16.63   |
| O <sub>3</sub> ( $\mu\text{g m}^{-3}$ )                                                                                  | 128.00 $\pm$ 12.56                        | 150.63 $\pm$ 25.31  | 138.65 $\pm$ 22.64  | 102.63 $\pm$ 7.31                         | 109.86 $\pm$ 11.01                          | 106.00 $\pm$ 9.91                           | 89.60 $\pm$ 7.36                                         | 99.50 $\pm$ 8.27    | 96.59 $\pm$ 9.20                            | 87.54 $\pm$ 11.47                                        | 96.40 $\pm$ 9.73    | 90.56 $\pm$ 11.55   |
| NO <sub>x</sub> ( $\mu\text{g m}^{-3}$ )                                                                                 | 12.93 $\pm$ 6.45                          | 24.73 $\pm$ 12.78   | 18.48 $\pm$ 11.56   | 6.46 $\pm$ 1.83                           | 26.72 $\pm$ 11.53                           | 15.92 $\pm$ 12.89                           | 3.05 $\pm$ 1.78                                          | 10.72 $\pm$ 4.48    | 8.47 $\pm$ 5.23                             | 6.64 $\pm$ 3.87                                          | 27.80 $\pm$ 13.74   | 12.52 $\pm$ 12.37   |
| SO <sub>4</sub> <sup>2-</sup> ( $\mu\text{g m}^{-3}$ )                                                                   | 10.99 $\pm$ 4.84                          | 22.09 $\pm$ 11.76   | 16.21 $\pm$ 10.40   | 9.12 $\pm$ 3.85                           | 30.38 $\pm$ 15.57                           | 19.04 $\pm$ 15.28                           | 5.52 $\pm$ 2.08                                          | 12.67 $\pm$ 5.14    | 10.56 $\pm$ 5.52                            | 3.97 $\pm$ 1.48                                          | 16.00 $\pm$ 7.14    | 7.31 $\pm$ 6.69     |
| NH <sub>4</sub> <sup>+</sup> ( $\mu\text{g m}^{-3}$ )                                                                    | 6.93 $\pm$ 2.81                           | 11.58 $\pm$ 6.01    | 9.11 $\pm$ 5.15     | 6.33 $\pm$ 1.68                           | 22.80 $\pm$ 13.83                           | 14.02 $\pm$ 12.58                           | 3.51 $\pm$ 2.09                                          | 9.73 $\pm$ 3.61     | 7.90 $\pm$ 4.31                             | 4.28 $\pm$ 2.85                                          | 13.75 $\pm$ 10.48   | 6.91 $\pm$ 7.37     |
| K <sup>+</sup> ( $\mu\text{g m}^{-3}$ )                                                                                  | 0.54 $\pm$ 0.23                           | 0.98 $\pm$ 0.40     | 0.75 $\pm$ 0.39     | 0.85 $\pm$ 0.27                           | 2.15 $\pm$ 0.74                             | 1.46 $\pm$ 0.84                             | 0.80 $\pm$ 0.52                                          | 2.28 $\pm$ 0.83     | 1.85 $\pm$ 1.01                             | 0.66 $\pm$ 0.44                                          | 0.90 $\pm$ 0.47     | 0.73 $\pm$ 0.46     |
| ALW ( $\mu\text{g m}^{-3}$ )                                                                                             | 10.84 $\pm$ 7.00                          | 26.29 $\pm$ 15.97   | 18.11 $\pm$ 14.33   | 6.94 $\pm$ 5.86                           | 70.33 $\pm$ 87.02                           | 36.52 $\pm$ 67.47                           | 11.94 $\pm$ 7.67                                         | 41.46 $\pm$ 17.28   | 32.78 $\pm$ 20.22                           | 7.69 $\pm$ 3.29                                          | 109.91 $\pm$ 149.35 | 36.09 $\pm$ 91.10   |
| Total org. acids <sup>d</sup> ( $\mu\text{g m}^{-3}$ )                                                                   | 0.28 $\pm$ 0.37                           | 0.43 $\pm$ 0.47     | 0.35 $\pm$ 0.43     | 0.32 $\pm$ 0.29                           | 1.06 $\pm$ 0.49                             | 0.67 $\pm$ 0.54                             | 0.73 $\pm$ 0.17                                          | 1.32 $\pm$ 0.48     | 1.15 $\pm$ 0.49                             | 0.28 $\pm$ 0.16                                          | 0.85 $\pm$ 0.46     | 0.43 $\pm$ 0.38     |
| (NO <sub>3</sub> <sup>-</sup> + 2SO <sub>4</sub> <sup>2-</sup> ) - NH <sub>4</sub> <sup>+</sup> ( $\mu\text{g m}^{-3}$ ) | 27.97 $\pm$ 13.30                         | 57.34 $\pm$ 24.40   | 47.79 $\pm$ 24.26   | 18.37 $\pm$ 7.67                          | 64.70 $\pm$ 28.15                           | 3.99 $\pm$ 30.58                            | 10.58 $\pm$ 3.95                                         | 26.33 $\pm$ 10.21   | 21.69 $\pm$ 11.58                           | 10.30 $\pm$ 4.93                                         | 46.06 $\pm$ 18.74   | 20.23 $\pm$ 19.28   |
| pH                                                                                                                       | 5.01 $\pm$ 0.17                           | 5.39 $\pm$ 1.01     | 5.19 $\pm$ 0.73     | 6.09 $\pm$ 0.34                           | 5.23 $\pm$ 0.41                             | 5.69 $\pm$ 0.57                             | 3.61 $\pm$ 1.21                                          | 4.62 $\pm$ 0.85     | 4.32 $\pm$ 1.07                             | 5.86 $\pm$ 1.09                                          | 4.03 $\pm$ 0.79     | 5.35 $\pm$ 1.30     |
| DMAH <sup>+</sup> ( $\mu\text{g m}^{-3}$ )                                                                               | 5.70 $\pm$ 1.69                           | 10.42 $\pm$ 5.70    | 7.92 $\pm$ 4.73     | 5.15 $\pm$ 1.44                           | 19.16 $\pm$ 10.44                           | 11.69 $\pm$ 10.04                           | 4.19 $\pm$ 2.10                                          | 11.73 $\pm$ 6.33    | 9.52 $\pm$ 6.43                             | 1.97 $\pm$ 2.01                                          | 2.91 $\pm$ 1.60     | 2.23 $\pm$ 1.95     |
| MMAH <sup>+</sup> ( $\mu\text{g m}^{-3}$ )                                                                               | 7.49 $\pm$ 4.37                           | 12.18 $\pm$ 5.01    | 9.70 $\pm$ 5.23     | 7.90 $\pm$ 2.56                           | 28.04 $\pm$ 14.44                           | 17.30 $\pm$ 14.21                           | 6.23 $\pm$ 3.77                                          | 23.37 $\pm$ 11.85   | 18.33 $\pm$ 12.82                           | 3.66 $\pm$ 3.09                                          | 5.18 $\pm$ 3.14     | 4.08 $\pm$ 3.18     |
| EAH <sup>+</sup> ( $\mu\text{g m}^{-3}$ )                                                                                | 1.46 $\pm$ 1.28                           | 2.80 $\pm$ 1.42     | 2.09 $\pm$ 1.50     | 1.25 $\pm$ 0.95                           | 4.66 $\pm$ 2.29                             | 2.84 $\pm$ 2.41                             | 1.21 $\pm$ 0.87                                          | 2.87 $\pm$ 1.05     | 2.38 $\pm$ 1.26                             | 1.36 $\pm$ 0.64                                          | 1.35 $\pm$ 0.64     | 1.36 $\pm$ 0.86     |
| DEAH <sup>+</sup> ( $\mu\text{g m}^{-3}$ )                                                                               | 1.70 $\pm$ 0.73                           | 2.37 $\pm$ 1.29     | 2.01 $\pm$ 1.09     | 15.05 $\pm$ 9.38                          | 31.27 $\pm$ 20.60                           | 22.62 $\pm$ 17.62                           | 0.14 $\pm$ 0.19                                          | 1.04 $\pm$ 0.90     | 0.77 $\pm$ 0.87                             | 0.35 $\pm$ 0.40                                          | 1.18 $\pm$ 0.64     | 0.58 $\pm$ 0.61     |
| PAH <sup>+</sup> ( $\mu\text{g m}^{-3}$ )                                                                                | 0.27 $\pm$ 0.52                           | 0.74 $\pm$ 0.59     | 0.49 $\pm$ 0.60     | 0.00 $\pm$ 0.00                           | 0.34 $\pm$ 0.26                             | 0.16 $\pm$ 0.25                             | 0.62 $\pm$ 0.32                                          | 0.85 $\pm$ 0.30     | 0.78 $\pm$ 0.32                             | 0.13 $\pm$ 0.27                                          | 0.54 $\pm$ 0.59     | 0.43 $\pm$ 0.55     |
| BAH <sup>+</sup> ( $\mu\text{g m}^{-3}$ )                                                                                | 0.40 $\pm$ 0.53                           | 1.05 $\pm$ 0.73     | 0.71 $\pm$ 0.71     | 0.16 $\pm$ 0.10                           | 0.62 $\pm$ 0.23                             | 0.38 $\pm$ 0.29                             | 1.11 $\pm$ 0.35                                          | 0.94 $\pm$ 0.33     | 1.19 $\pm$ 0.33                             | 0.83 $\pm$ 0.78                                          | 0.60 $\pm$ 0.42     | 0.77 $\pm$ 0.71     |
| PYRH <sup>+</sup> ( $\mu\text{g m}^{-3}$ )                                                                               | 0.72 $\pm$ 0.57                           | 1.40 $\pm$ 0.65     | 1.04 $\pm$ 0.70     | 0.65 $\pm$ 0.48                           | 3.34 $\pm$ 1.23                             | 1.91 $\pm$ 1.62                             | 0.58 $\pm$ 0.22                                          | 1.49 $\pm$ 0.45     | 1.22 $\pm$ 0.58                             | 0.60 $\pm$ 0.58                                          | 0.27 $\pm$ 0.36     | 0.51 $\pm$ 0.55     |
| Total aminiums ( $\mu\text{g m}^{-3}$ )                                                                                  | 17.75 $\pm$ 8.06 (Y) <sup>e</sup>         | 30.96 $\pm$ 12.52   | 23.97 $\pm$ 12.32   | 30.17 $\pm$ 12.87 (Y)                     | 87.45 $\pm$ 42.52                           | 56.90 $\pm$ 41.81                           | 13.90 $\pm$ 6.83 (Y)                                     | 42.53 $\pm$ 19.92   | 34.11 $\pm$ 21.54                           | 9.31 $\pm$ 8.01 (N)                                      | 11.62 $\pm$ 6.50    | 9.95 $\pm$ 7.69     |
| TA/NH <sub>4</sub> <sup>+</sup>                                                                                          | 2.55 $\pm$ 0.53 (N)                       | 3.48 $\pm$ 2.97     | 2.99 $\pm$ 2.12     | 4.19 $\pm$ 2.09 (N)                       | 4.33 $\pm$ 1.69                             | 4.64 $\pm$ 1.94                             | 4.48 $\pm$ 1.10 (N)                                      | 4.53 $\pm$ 2.07     | 4.51 $\pm$ 1.84                             | 2.31 $\pm$ 2.15 (N)                                      | 1.65 $\pm$ 2.18     | 2.13 $\pm$ 2.18     |

<sup>a</sup>The numbers in parentheses indicate the number of samples.

<sup>b</sup>The ventilation coefficient (VC) value can be used to characterize the state of atmospheric dilution in pollutant concentrations (Gani et al., 2019). The VC value can be expressed as a product of wind speed and planetary boundary layer height (PBLH).

<sup>c</sup>The numbers in parentheses indicate the days of rainfall.

<sup>d</sup>It represents the total concentrations of six organic acids including formic acid (HCOO<sup>-</sup>), acetic acid (CH<sub>3</sub>COO<sup>-</sup>), oxalic acid (C<sub>2</sub>O<sub>4</sub><sup>2-</sup>), succinic acid (C<sub>4</sub>H<sub>4</sub>O<sub>4</sub><sup>2-</sup>), methanesulfonic acid (CH<sub>3</sub>SO<sub>3</sub><sup>-</sup>), and glutaric acid (C<sub>5</sub>H<sub>6</sub>O<sub>4</sub><sup>2-</sup>).

<sup>e</sup>The symbols (Y) and (N) indicate significant and insignificant differences (*t*-Test at 0.05 level) in the average values of the parameters for clean and polluted days, respectively.

**Table S2.** Mean values ( $\pm$  SD) of the main parameters observed in different periods and locations.

| Parameters                                                                                                               | Xi'an (XA)<br>Dec. 22, 2017 to Jan. 20, 2018 ( $n = 29$ ) <sup>a</sup> |                                             |                                             | Wulumuqi (WLMQ)<br>Mar. 3–28, 2018 ( $n = 14$ ) <sup>a</sup> | Chengdu (CD)<br>Dec. 1–31, 2017 ( $n = 17$ ) <sup>a</sup> |                    |                     | Wuhan (WH)<br>Dec. 6–29, 2017 ( $n = 15$ ) <sup>a</sup> |                     |                     |
|--------------------------------------------------------------------------------------------------------------------------|------------------------------------------------------------------------|---------------------------------------------|---------------------------------------------|--------------------------------------------------------------|-----------------------------------------------------------|--------------------|---------------------|---------------------------------------------------------|---------------------|---------------------|
|                                                                                                                          | Clean day                                                              | Polluted day                                | Full period                                 | Clean day                                                    | Clean day                                                 | Polluted day       | Full period         | Clean day                                               | Polluted day        | Full period         |
|                                                                                                                          | PM <sub>2.5</sub> ( $\mu\text{g m}^{-3}$ )                             | 51.00 $\pm$ 12.98                           | 159.40 $\pm$ 60.09                          | 144.45 $\pm$ 67.33                                           | 34.07 $\pm$ 18.29                                         | 56.86 $\pm$ 12.06  | 138.70 $\pm$ 29.99  | 105.00 $\pm$ 47.03                                      | 56.83 $\pm$ 8.59    | 114.89 $\pm$ 21.98  |
| T ( $^{\circ}\text{C}$ )                                                                                                 | -2.02 $\pm$ 2.59                                                       | -4.17 $\pm$ 1.40                            | -1.68 $\pm$ 2.57                            | 6.81 $\pm$ 4.14                                              | 7.26 $\pm$ 3.18                                           | 7.78 $\pm$ 2.35    | 7.56 $\pm$ 2.73     | 3.65 $\pm$ 2.75                                         | 5.21 $\pm$ 4.60     | 4.59 $\pm$ 4.04     |
| RH (%)                                                                                                                   | 47.08 $\pm$ 9.54                                                       | 70.98 $\pm$ 14.45                           | 67.68 $\pm$ 16.14                           | 64.08 $\pm$ 12.87                                            | 74.30 $\pm$ 6.20                                          | 78.95 $\pm$ 6.25   | 77.04 $\pm$ 6.64    | 61.67 $\pm$ 19.52                                       | 64.23 $\pm$ 12.08   | 63.21 $\pm$ 15.54   |
| Wind speed ( $\text{m s}^{-1}$ )                                                                                         | 10.14 $\pm$ 2.05                                                       | 5.14 $\pm$ 2.35                             | 5.83 $\pm$ 2.89                             | 1.72 $\pm$ 0.48                                              | 1.28 $\pm$ 0.45                                           | 1.09 $\pm$ 0.21    | 1.17 $\pm$ 0.34     | 2.40 $\pm$ 0.61                                         | 1.94 $\pm$ 0.63     | 2.12 $\pm$ 0.66     |
| VC <sup>b</sup> ( $\text{m}^2 \text{s}^{-1}$ )                                                                           | 1489.30 $\pm$ 553.62                                                   | 826.75 $\pm$ 571.42                         | 918.14 $\pm$ 613.15                         | 396.77 $\pm$ 164.14                                          | 483.56 $\pm$ 156.03                                       | 296.32 $\pm$ 71.82 | 373.42 $\pm$ 146.80 | 764.58 $\pm$ 384.17                                     | 437.39 $\pm$ 244.80 | 568.27 $\pm$ 347.40 |
| PBLH (m)                                                                                                                 | 159.45 $\pm$ 73.12                                                     | 171.29 $\pm$ 82.64                          | 169.65 $\pm$ 81.49                          | 230.12 $\pm$ 66.52                                           | 385.03 $\pm$ 61.64                                        | 272.50 $\pm$ 42.69 | 318.84 $\pm$ 75.52  | 315.71 $\pm$ 116.95                                     | 214.63 $\pm$ 79.69  | 255.06 $\pm$ 108.32 |
| Amount of rainfall (mm)                                                                                                  | 0.00 $\pm$ 0.00                                                        | 1.26 $\pm$ 3.07<br>( $n = 5$ ) <sup>c</sup> | 1.09 $\pm$ 2.89<br>( $n = 5$ ) <sup>c</sup> | 0.29 $\pm$ 0.80<br>( $n = 2$ ) <sup>c</sup>                  | 0.00 $\pm$ 0.00                                           | 0.00 $\pm$ 0.00    | 0.00 $\pm$ 0.00     | 0.00 $\pm$ 0.00                                         | 0.00 $\pm$ 0.00     | 0.00 $\pm$ 0.00     |
| SO <sub>2</sub> ( $\mu\text{g m}^{-3}$ )                                                                                 | 19.75 $\pm$ 1.79                                                       | 31.84 $\pm$ 8.83                            | 30.17 $\pm$ 9.22                            | 10.71 $\pm$ 2.86                                             | 11.14 $\pm$ 2.17                                          | 13.10 $\pm$ 2.07   | 12.29 $\pm$ 2.32    | 12.83 $\pm$ 7.31                                        | 18.44 $\pm$ 4.72    | 16.20 $\pm$ 6.50    |
| NO <sub>2</sub> ( $\mu\text{g m}^{-3}$ )                                                                                 | 79.24 $\pm$ 23.93                                                      | 55.25 $\pm$ 6.91                            | 83.08 $\pm$ 23.45                           | 35.07 $\pm$ 8.77                                             | 112.14 $\pm$ 9.45                                         | 133.50 $\pm$ 28.38 | 124.71 $\pm$ 24.92  | 57.83 $\pm$ 17.94                                       | 84.00 $\pm$ 12.52   | 73.53 $\pm$ 19.67   |
| O <sub>3</sub> ( $\mu\text{g m}^{-3}$ )                                                                                  | 38.55 $\pm$ 17.38                                                      | 66.75 $\pm$ 6.30                            | 34.04 $\pm$ 14.02                           | 52.29 $\pm$ 9.26                                             | 50.86 $\pm$ 12.14                                         | 47.60 $\pm$ 19.88  | 48.94 $\pm$ 17.19   | 40.83 $\pm$ 18.90                                       | 34.56 $\pm$ 19.56   | 37.07 $\pm$ 19.54   |
| O <sub>x</sub> ( $\mu\text{g m}^{-3}$ )                                                                                  | 122.00 $\pm$ 7.04                                                      | 117.12 $\pm$ 22.66                          | 117.79 $\pm$ 21.26                          | 87.36 $\pm$ 12.20                                            | 112.14 $\pm$ 9.45                                         | 133.50 $\pm$ 28.38 | 124.71 $\pm$ 24.92  | 98.67 $\pm$ 34.73                                       | 118.56 $\pm$ 21.92  | 110.60 $\pm$ 29.42  |
| NO <sub>3</sub> <sup>-</sup> ( $\mu\text{g m}^{-3}$ )                                                                    | 40.39 $\pm$ 24.31                                                      | 9.72 $\pm$ 3.20                             | 36.16 $\pm$ 24.95                           | 6.68 $\pm$ 4.63                                              | 11.82 $\pm$ 4.37                                          | 33.64 $\pm$ 14.85  | 24.65 $\pm$ 15.90   | 15.72 $\pm$ 8.16                                        | 27.88 $\pm$ 10.78   | 23.02 $\pm$ 11.48   |
| SO <sub>4</sub> <sup>2-</sup> ( $\mu\text{g m}^{-3}$ )                                                                   | 15.56 $\pm$ 12.13                                                      | 25.13 $\pm$ 12.54                           | 23.81 $\pm$ 12.91                           | 6.13 $\pm$ 3.26                                              | 6.45 $\pm$ 1.82                                           | 16.26 $\pm$ 6.47   | 12.22 $\pm$ 7.02    | 8.59 $\pm$ 2.74                                         | 10.39 $\pm$ 3.68    | 9.67 $\pm$ 3.45     |
| NH <sub>4</sub> <sup>+</sup> ( $\mu\text{g m}^{-3}$ )                                                                    | 5.18 $\pm$ 1.30                                                        | 21.42 $\pm$ 14.12                           | 19.18 $\pm$ 14.27                           | 3.54 $\pm$ 1.71                                              | 5.71 $\pm$ 1.96                                           | 15.70 $\pm$ 8.80   | 11.59 $\pm$ 8.44    | 7.16 $\pm$ 2.04                                         | 9.95 $\pm$ 3.49     | 8.83 $\pm$ 3.29     |
| K <sup>+</sup> ( $\mu\text{g m}^{-3}$ )                                                                                  | 0.91 $\pm$ 0.56                                                        | 2.13 $\pm$ 1.70                             | 1.96 $\pm$ 1.65                             | 0.16 $\pm$ 0.13                                              | 0.92 $\pm$ 0.31                                           | 1.67 $\pm$ 0.39    | 1.36 $\pm$ 0.51     | 0.74 $\pm$ 0.29                                         | 1.47 $\pm$ 0.53     | 1.18 $\pm$ 0.57     |
| ALW ( $\mu\text{g m}^{-3}$ )                                                                                             | 12.80 $\pm$ 10.66                                                      | 94.99 $\pm$ 76.11                           | 83.25 $\pm$ 76.21                           | 10.22 $\pm$ 6.25                                             | 25.21 $\pm$ 19.67                                         | 107.37 $\pm$ 87.24 | 73.54 $\pm$ 79.19   | 34.36 $\pm$ 42.74                                       | 37.24 $\pm$ 33.06   | 36.09 $\pm$ 37.26   |
| Total org. acids <sup>d</sup> ( $\mu\text{g m}^{-3}$ )                                                                   | 0.87 $\pm$ 0.59                                                        | 1.15 $\pm$ 1.23                             | 1.11 $\pm$ 1.17                             | 0.04 $\pm$ 0.03                                              | 0.66 $\pm$ 0.33                                           | 1.99 $\pm$ 0.86    | 1.45 $\pm$ 0.95     | 0.85 $\pm$ 0.24                                         | 1.10 $\pm$ 0.22     | 1.04 $\pm$ 0.29     |
| (NO <sub>3</sub> <sup>-</sup> + 2SO <sub>4</sub> <sup>2-</sup> - NH <sub>4</sub> <sup>+</sup> ) ( $\mu\text{g m}^{-3}$ ) | 69.22 $\pm$ 33.07                                                      | 35.66 $\pm$ 26.06                           | 64.59 $\pm$ 34.21                           | 15.34 $\pm$ 8.45                                             | 19.01 $\pm$ 5.95                                          | 50.46 $\pm$ 17.27  | 37.51 $\pm$ 20.73   | 25.73 $\pm$ 10.18                                       | 38.71 $\pm$ 13.72   | 33.52 $\pm$ 13.96   |
| pH                                                                                                                       | 5.07 $\pm$ 0.28                                                        | 4.37 $\pm$ 0.69                             | 4.46 $\pm$ 0.69                             | 4.31 $\pm$ 1.63                                              | 3.45 $\pm$ 0.22                                           | 3.31 $\pm$ 0.39    | 3.37 $\pm$ 0.34     | 3.85 $\pm$ 0.99                                         | 3.68 $\pm$ 0.62     | 3.75 $\pm$ 0.79     |
| DMAH <sup>+</sup> ( $\mu\text{g m}^{-3}$ )                                                                               | 3.59 $\pm$ 1.54                                                        | 6.75 $\pm$ 4.35                             | 6.31 $\pm$ 4.22                             | 1.92 $\pm$ 0.74                                              | 7.75 $\pm$ 4.38                                           | 15.37 $\pm$ 5.23   | 12.23 $\pm$ 6.16    | 5.43 $\pm$ 1.42                                         | 8.01 $\pm$ 2.95     | 6.98 $\pm$ 2.76     |
| MMAH <sup>+</sup> ( $\mu\text{g m}^{-3}$ )                                                                               | 8.74 $\pm$ 3.19                                                        | 16.06 $\pm$ 9.53                            | 15.05 $\pm$ 9.28                            | 1.07 $\pm$ 0.55                                              | 10.37 $\pm$ 5.79                                          | 23.71 $\pm$ 8.02   | 18.22 $\pm$ 9.73    | 8.80 $\pm$ 3.11                                         | 15.35 $\pm$ 8.27    | 12.73 $\pm$ 7.43    |
| EAH <sup>+</sup> ( $\mu\text{g m}^{-3}$ )                                                                                | 3.44 $\pm$ 3.01                                                        | 1.91 $\pm$ 1.39                             | 2.12 $\pm$ 1.79                             | 0.45 $\pm$ 0.06                                              | 6.54 $\pm$ 4.87                                           | 17.00 $\pm$ 12.69  | 12.70 $\pm$ 11.45   | 1.99 $\pm$ 1.36                                         | 2.03 $\pm$ 1.24     | 2.01 $\pm$ 1.29     |
| DEAH <sup>+</sup> ( $\mu\text{g m}^{-3}$ )                                                                               | 0.84 $\pm$ 0.93                                                        | 1.97 $\pm$ 1.54                             | 1.82 $\pm$ 1.52                             | 0.65 $\pm$ 0.21                                              | 3.58 $\pm$ 2.66                                           | 5.56 $\pm$ 1.91    | 4.75 $\pm$ 2.45     | 1.08 $\pm$ 0.25                                         | 1.68 $\pm$ 0.73     | 1.44 $\pm$ 0.65     |
| PAH <sup>+</sup> ( $\mu\text{g m}^{-3}$ )                                                                                | 0.48 $\pm$ 0.28                                                        | 0.28 $\pm$ 0.37                             | 0.31 $\pm$ 0.37                             | 0.00 $\pm$ 0.00                                              | 0.04 $\pm$ 0.07                                           | 0.21 $\pm$ 0.20    | 0.14 $\pm$ 0.18     | 0.04 $\pm$ 0.07                                         | 0.02 $\pm$ 0.04     | 0.03 $\pm$ 0.06     |
| BAH <sup>+</sup> ( $\mu\text{g m}^{-3}$ )                                                                                | 1.16 $\pm$ 0.21                                                        | 0.86 $\pm$ 0.50                             | 0.90 $\pm$ 0.48                             | 0.07 $\pm$ 0.05                                              | 0.25 $\pm$ 0.11                                           | 0.40 $\pm$ 0.16    | 0.34 $\pm$ 0.16     | 0.20 $\pm$ 0.07                                         | 0.25 $\pm$ 0.09     | 0.23 $\pm$ 0.09     |
| PYRH <sup>+</sup> ( $\mu\text{g m}^{-3}$ )                                                                               | 1.05 $\pm$ 0.08                                                        | 1.11 $\pm$ 0.08                             | 1.11 $\pm$ 0.74                             | 0.00 $\pm$ 0.00                                              | 1.29 $\pm$ 0.82                                           | 2.49 $\pm$ 1.12    | 1.99 $\pm$ 1.16     | 0.64 $\pm$ 0.25                                         | 1.29 $\pm$ 0.62     | 1.03 $\pm$ 0.60     |
| Total aminiums ( $\mu\text{g m}^{-3}$ )                                                                                  | 19.31 $\pm$ 8.31 (Y) <sup>e</sup>                                      | 28.95 $\pm$ 16.75                           | 27.62 $\pm$ 16.20                           | 4.16 $\pm$ 1.24                                              | 29.83 $\pm$ 16.75 (Y)                                     | 64.73 $\pm$ 20.57  | 50.36 $\pm$ 25.68   | 18.18 $\pm$ 4.86 (Y)                                    | 28.62 $\pm$ 13.09   | 24.44 $\pm$ 11.77   |
| TA/NH <sub>4</sub> <sup>+</sup>                                                                                          | 4.07 $\pm$ 2.19 (Y)                                                    | 1.94 $\pm$ 1.56                             | 2.24 $\pm$ 1.82                             | 1.34 $\pm$ 0.54                                              | 4.93 $\pm$ 1.44 (N)                                       | 4.72 $\pm$ 1.36    | 4.81 $\pm$ 1.40     | 3.01 $\pm$ 1.15 (N)                                     | 2.62 $\pm$ 0.61     | 2.85 $\pm$ 0.99     |

<sup>a</sup>The numbers in parentheses indicate the number of samples.

<sup>b</sup>The VC value can be used to characterize the state of atmospheric dilution in pollutant concentrations (Gani et al., 2019). The VC value can be expressed as a product of wind speed and PBLH.

<sup>c</sup>The numbers in parentheses indicate the days of rainfall.

<sup>d</sup>It represents the total concentrations of six organic acids mentioned in Table S1.

<sup>e</sup>The symbols (Y) and (N) indicate significant and insignificant differences (*t*-Test at 0.05 level) in the average values of the parameters for clean and polluted days, respectively.

**Table S3.** Mean values ( $\pm$  SD) of the main parameters observed in different periods and locations.

| Parameters                                                                                                                                                | Hangzhou (HZ)<br>Dec. 4–31, 2017 ( $n = 17$ ) <sup>a</sup> |                                             |                                             | Guangzhou (GZ)<br>Dec. 1–30, 2017 ( $n = 17$ ) <sup>a</sup> |                                             |                                             | Guiyang (GY)<br>Dec. 10, 2017 to Jan. 11, 2018 ( $n = 17$ ) <sup>a</sup> |                     |                                             |
|-----------------------------------------------------------------------------------------------------------------------------------------------------------|------------------------------------------------------------|---------------------------------------------|---------------------------------------------|-------------------------------------------------------------|---------------------------------------------|---------------------------------------------|--------------------------------------------------------------------------|---------------------|---------------------------------------------|
|                                                                                                                                                           | Clean day                                                  | Polluted day                                | Full period                                 | Clean day                                                   | Polluted day                                | Full period                                 | Clean day                                                                | Polluted day        | Full period                                 |
|                                                                                                                                                           | PM <sub>2.5</sub> ( $\mu\text{g m}^{-3}$ )                 | 46.38 $\pm$ 13.48                           | 105.11 $\pm$ 30.01                          | 77.47 $\pm$ 37.71                                           | 45.33 $\pm$ 19.01                           | 83.60 $\pm$ 5.31                            | 56.59 $\pm$ 23.82                                                        | 41.47 $\pm$ 14.44   | 100.50 $\pm$ 13.50                          |
| T ( $^{\circ}\text{C}$ )                                                                                                                                  | 7.38 $\pm$ 3.17                                            | 8.00 $\pm$ 5.43                             | 7.71 $\pm$ 4.52                             | 15.06 $\pm$ 4.28                                            | 18.41 $\pm$ 4.59                            | 16.04 $\pm$ 4.63                            | 4.09 $\pm$ 3.22                                                          | 8.80 $\pm$ 0.30     | 4.65 $\pm$ 3.39                             |
| RH (%)                                                                                                                                                    | 64.17 $\pm$ 19.25                                          | 69.33 $\pm$ 15.09                           | 66.90 $\pm$ 17.36                           | 63.21 $\pm$ 13.12                                           | 69.53 $\pm$ 6.87                            | 65.07 $\pm$ 11.99                           | 79.95 $\pm$ 13.27                                                        | 60.90 $\pm$ 2.60    | 77.71 $\pm$ 13.92                           |
| Wind speed ( $\text{m s}^{-1}$ )                                                                                                                          | 2.46 $\pm$ 0.70                                            | 2.19 $\pm$ 0.96                             | 2.32 $\pm$ 0.86                             | 3.69 $\pm$ 1.35                                             | 2.13 $\pm$ 0.62                             | 3.23 $\pm$ 1.38                             | 2.64 $\pm$ 0.53                                                          | 1.58 $\pm$ 0.04     | 2.52 $\pm$ 0.60                             |
| VC <sup>b</sup> ( $\text{m}^2 \text{s}^{-1}$ )                                                                                                            | 970.49 $\pm$ 568.32                                        | 817.49 $\pm$ 776.37                         | 889.49 $\pm$ 690.60                         | 1703.32 $\pm$ 1018.18                                       | 470.35 $\pm$ 281.24                         | 1340.69 $\pm$ 1034.73                       | 1041.78 $\pm$ 512.05                                                     | 656.11 $\pm$ 158.86 | 996.40 $\pm$ 499.76                         |
| PBLH (m)                                                                                                                                                  | 310.78 $\pm$ 182.84                                        | 377.66 $\pm$ 128.87                         | 342.26 $\pm$ 163.18                         | 420.39 $\pm$ 141.33                                         | 205.03 $\pm$ 81.28                          | 357.05 $\pm$ 160.22                         | 390.80 $\pm$ 167.15                                                      | 417.31 $\pm$ 111.32 | 393.92 $\pm$ 161.81                         |
| Amount of rainfall<br>(mm)                                                                                                                                | 4.50 $\pm$ 7.31<br>( $n = 3$ ) <sup>c</sup>                | 0.98 $\pm$ 2.59<br>( $n = 2$ ) <sup>c</sup> | 2.64 $\pm$ 5.64<br>( $n = 5$ ) <sup>c</sup> | 0.00 $\pm$ 0.00                                             | 0.14 $\pm$ 0.28<br>( $n = 1$ ) <sup>c</sup> | 0.04 $\pm$ 0.16<br>( $n = 1$ ) <sup>c</sup> | 2.01 $\pm$ 5.36                                                          | 0.00 $\pm$ 0.00     | 1.77 $\pm$ 5.08<br>( $n = 6$ ) <sup>c</sup> |
| SO <sub>2</sub> ( $\mu\text{g m}^{-3}$ )                                                                                                                  | 12.13 $\pm$ 3.26                                           | 14.56 $\pm$ 2.99                            | 13.41 $\pm$ 3.34                            | 15.17 $\pm$ 4.49                                            | 23.60 $\pm$ 1.02                            | 17.65 $\pm$ 5.41                            | 30.73 $\pm$ 10.30                                                        | 35.50 $\pm$ 0.50    | 31.29 $\pm$ 9.80                            |
| NO <sub>2</sub> ( $\mu\text{g m}^{-3}$ )                                                                                                                  | 59.50 $\pm$ 5.48                                           | 73.78 $\pm$ 15.50                           | 67.06 $\pm$ 13.86                           | 64.75 $\pm$ 25.49                                           | 103.80 $\pm$ 15.89                          | 76.24 $\pm$ 29.15                           | 36.93 $\pm$ 17.94                                                        | 79.50 $\pm$ 5.50    | 41.94 $\pm$ 21.81                           |
| O <sub>3</sub> ( $\mu\text{g m}^{-3}$ )                                                                                                                   | 45.63 $\pm$ 19.33                                          | 49.78 $\pm$ 24.69                           | 47.82 $\pm$ 22.43                           | 71.25 $\pm$ 21.74                                           | 67.40 $\pm$ 31.66                           | 70.12 $\pm$ 25.13                           | 28.53 $\pm$ 17.91                                                        | 36.00 $\pm$ 13.00   | 29.41 $\pm$ 17.57                           |
| O <sub>3</sub> ( $\mu\text{g m}^{-3}$ )                                                                                                                   | 105.13 $\pm$ 19.61                                         | 123.56 $\pm$ 19.72                          | 114.88 $\pm$ 21.71                          | 136.00 $\pm$ 39.08                                          | 171.20 $\pm$ 32.83                          | 146.35 $\pm$ 40.65                          | 65.47 $\pm$ 24.87                                                        | 115.50 $\pm$ 18.50  | 71.35 $\pm$ 29.09                           |
| NO <sub>3</sub> ( $\mu\text{g m}^{-3}$ )                                                                                                                  | 12.56 $\pm$ 2.37                                           | 30.94 $\pm$ 9.81                            | 22.29 $\pm$ 11.73                           | 4.39 $\pm$ 2.20                                             | 9.29 $\pm$ 2.87                             | 5.83 $\pm$ 3.29                             | 4.44 $\pm$ 3.05                                                          | 9.21 $\pm$ 3.47     | 5.00 $\pm$ 3.46                             |
| SO <sub>4</sub> <sup>2-</sup> ( $\mu\text{g m}^{-3}$ )                                                                                                    | 5.37 $\pm$ 1.49                                            | 10.86 $\pm$ 4.12                            | 8.28 $\pm$ 4.19                             | 7.67 $\pm$ 2.73                                             | 12.09 $\pm$ 1.89                            | 8.97 $\pm$ 3.22                             | 7.35 $\pm$ 2.64                                                          | 17.22 $\pm$ 4.60    | 8.51 $\pm$ 4.33                             |
| NH <sub>4</sub> <sup>+</sup> ( $\mu\text{g m}^{-3}$ )                                                                                                     | 5.55 $\pm$ 0.83                                            | 13.95 $\pm$ 8.36                            | 10.00 $\pm$ 7.41                            | 3.51 $\pm$ 1.27                                             | 6.03 $\pm$ 1.02                             | 4.25 $\pm$ 1.66                             | 3.25 $\pm$ 1.33                                                          | 7.65 $\pm$ 2.55     | 3.77 $\pm$ 2.09                             |
| K <sup>+</sup> ( $\mu\text{g m}^{-3}$ )                                                                                                                   | 0.63 $\pm$ 0.22                                            | 1.20 $\pm$ 0.23                             | 0.93 $\pm$ 0.36                             | 0.57 $\pm$ 0.28                                             | 1.13 $\pm$ 0.15                             | 0.73 $\pm$ 0.36                             | 0.38 $\pm$ 0.24                                                          | 1.14 $\pm$ 0.18     | 0.47 $\pm$ 0.34                             |
| ALW ( $\mu\text{g m}^{-3}$ )                                                                                                                              | 45.58 $\pm$ 65.02                                          | 78.22 $\pm$ 89.59                           | 62.86 $\pm$ 80.65                           | 7.34 $\pm$ 5.73                                             | 18.40 $\pm$ 9.42                            | 10.59 $\pm$ 8.64                            | 39.83 $\pm$ 76.00                                                        | 16.77 $\pm$         | 37.12 $\pm$ 71.86                           |
| Total org. acids <sup>d</sup> ( $\mu\text{g m}^{-3}$ )<br>(NO <sub>3</sub> <sup>-</sup> + 2SO <sub>4</sub> <sup>2-</sup> - NH <sub>4</sub> <sup>+</sup> ) | 0.17 $\pm$ 0.10                                            | 0.58 $\pm$ 0.44                             | 0.39 $\pm$ 0.39                             | 0.38 $\pm$ 0.42                                             | 1.11 $\pm$ 0.39                             | 0.59 $\pm$ 0.53                             | 0.46 $\pm$ 0.32                                                          | 1.55 $\pm$ 0.59     | 0.59 $\pm$ 0.51                             |
| pH                                                                                                                                                        | 3.76 $\pm$ 0.45                                            | 3.67 $\pm$ 0.68                             | 3.71 $\pm$ 0.59                             | 2.44 $\pm$ 0.47                                             | 2.35 $\pm$ 0.36                             | 2.41 $\pm$ 0.44                             | 3.22 $\pm$ 0.52                                                          | 3.02 $\pm$ 0.37     | 3.20 $\pm$ 0.51                             |
| DMAH <sup>+</sup> ( $\mu\text{g m}^{-3}$ )                                                                                                                | 6.71 $\pm$ 5.82                                            | 16.49 $\pm$ 7.39                            | 11.89 $\pm$ 8.29                            | 2.36 $\pm$ 0.94                                             | 6.47 $\pm$ 3.71                             | 3.57 $\pm$ 2.87                             | 6.67 $\pm$ 4.09                                                          | 16.10 $\pm$ 11.30   | 7.78 $\pm$ 6.25                             |
| MMAH <sup>+</sup> ( $\mu\text{g m}^{-3}$ )                                                                                                                | 7.85 $\pm$ 3.30                                            | 26.62 $\pm$ 11.81                           | 17.79 $\pm$ 12.91                           | 4.94 $\pm$ 2.34                                             | 10.55 $\pm$ 1.80                            | 6.59 $\pm$ 3.37                             | 14.36 $\pm$ 10.99                                                        | 45.75 $\pm$ 29.35   | 18.06 $\pm$ 17.61                           |
| EAH <sup>+</sup> ( $\mu\text{g m}^{-3}$ )                                                                                                                 | 2.17 $\pm$ 1.95                                            | 5.93 $\pm$ 2.60                             | 4.16 $\pm$ 2.98                             | 0.71 $\pm$ 0.42                                             | 0.94 $\pm$ 0.65                             | 0.78 $\pm$ 0.51                             | 2.20 $\pm$ 1.77                                                          | 6.45 $\pm$ 3.75     | 2.70 $\pm$ 2.51                             |
| DEAH <sup>+</sup> ( $\mu\text{g m}^{-3}$ )                                                                                                                | 2.48 $\pm$ 2.49                                            | 5.79 $\pm$ 2.74                             | 4.23 $\pm$ 3.10                             | 6.86 $\pm$ 4.23                                             | 11.28 $\pm$ 4.09                            | 8.16 $\pm$ 4.65                             | 0.33 $\pm$ 0.47                                                          | 0.35 $\pm$ 0.35     | 0.33 $\pm$ 0.46                             |
| PAH <sup>+</sup> ( $\mu\text{g m}^{-3}$ )                                                                                                                 | 0.16 $\pm$ 0.28                                            | 0.51 $\pm$ 0.46                             | 0.35 $\pm$ 0.42                             | 0.29 $\pm$ 0.30                                             | 0.16 $\pm$ 0.32                             | 0.25 $\pm$ 0.31                             | 0.54 $\pm$ 0.53                                                          | 1.55 $\pm$ 0.65     | 0.66 $\pm$ 0.63                             |
| BAH <sup>+</sup> ( $\mu\text{g m}^{-3}$ )                                                                                                                 | 0.39 $\pm$ 0.40                                            | 0.94 $\pm$ 0.53                             | 0.68 $\pm$ 0.54                             | 0.47 $\pm$ 0.39                                             | 0.34 $\pm$ 0.34                             | 0.43 $\pm$ 0.38                             | 0.88 $\pm$ 0.44                                                          | 1.40 $\pm$ 0.30     | 0.94 $\pm$ 0.46                             |
| PYRH <sup>+</sup> ( $\mu\text{g m}^{-3}$ )                                                                                                                | 0.45 $\pm$ 0.35                                            | 1.48 $\pm$ 0.53                             | 0.99 $\pm$ 0.69                             | 0.36 $\pm$ 0.39                                             | 0.84 $\pm$ 0.40                             | 0.50 $\pm$ 0.45                             | 1.72 $\pm$ 1.23                                                          | 4.65 $\pm$ 3.05     | 2.06 $\pm$ 1.82                             |
| Total aminiums ( $\mu\text{g m}^{-3}$ )                                                                                                                   | 20.22 $\pm$ 11.75 (Y) <sup>e</sup>                         | 57.75 $\pm$ 23.86                           | 40.09 $\pm$ 26.78                           | 16.00 $\pm$ 6.37 (Y)                                        | 30.57 $\pm$ 9.22                            | 20.29 $\pm$ 9.89                            | 26.71 $\pm$ 18.36 (Y)                                                    | 76.25 $\pm$ 48.75   | 32.53 $\pm$ 28.84                           |
| TA/NH <sub>4</sub> <sup>+</sup>                                                                                                                           | 3.52 $\pm$ 1.62 (N)                                        | 4.54 $\pm$ 1.66                             | 4.06 $\pm$ 1.72                             | 5.07 $\pm$ 2.60 (N)                                         | 5.12 $\pm$ 1.42                             | 5.09 $\pm$ 2.32                             | 8.37 $\pm$ 4.12 (N)                                                      | 8.82 $\pm$ 3.43     | 8.43 $\pm$ 4.04                             |

<sup>a</sup>The numbers in parentheses indicate the number of samples.

<sup>b</sup>The VC value can be used to characterize the state of atmospheric dilution in pollutant concentrations (Gani et al., 2019). The VC value can be expressed as a product of wind speed and PBLH.

<sup>c</sup>The numbers in parentheses indicate the days of rainfall.

<sup>d</sup>It represents the total concentrations of six organic acids six organic acids mentioned in Table S1.

<sup>e</sup>The symbols (Y) and (N) indicate significant and insignificant differences (*t*-Test at 0.05 level) in the average values of the parameters for clean and polluted days, respectively.

**Table S4.** Mean mass concentrations of various aminiums in PM<sub>2.5</sub> or cloud water in different seasons and locations.

| Type of site    | Research area     | Year      | Period | DMAH <sup>+</sup><br>(ng m <sup>-3</sup> ) | MMAH <sup>+</sup><br>(ng m <sup>-3</sup> ) | EAH <sup>+</sup><br>(ng m <sup>-3</sup> ) | DEAH <sup>+</sup><br>(ng m <sup>-3</sup> ) | Other aminiums <sup>a</sup><br>(ng m <sup>-3</sup> ) | Total aminiums<br>(ng m <sup>-3</sup> ) | Reference            |
|-----------------|-------------------|-----------|--------|--------------------------------------------|--------------------------------------------|-------------------------------------------|--------------------------------------------|------------------------------------------------------|-----------------------------------------|----------------------|
| Urban           | Guangzhou (China) | 2020      | Summer | 15.6                                       | 29.1                                       | 6.5                                       | 40.6                                       | 19.5                                                 | 111.3                                   | (Chen et al., 2022b) |
|                 | Guangzhou (China) | 2018      | Autumn | 49.0                                       | 243.0                                      | –                                         | 1.0                                        | 4.0                                                  | 297.0                                   | (Huang et al., 2022) |
|                 | Guangzhou (China) | 2015–2016 | Winter | 28.6                                       | 40.4                                       | 2.7                                       | 7.0                                        | 41.3                                                 | 120                                     | (Liu et al., 2022a)  |
|                 | Guangzhou (China) | 2017–2018 | Winter | 3.4                                        | 6.3                                        | 1.3                                       | 10.2                                       | 2.2                                                  | 23.4                                    | (Liu et al., 2023)   |
|                 | Xiamen (China)    | 2013      | Winter | 1.7                                        | 10.2                                       | 5.3                                       | 0.9                                        | 35.6                                                 | 53.7                                    | (Ho et al., 2016)    |
|                 | Hong Kong (China) | 2013      | Winter | 1.5                                        | 12.1                                       | 4.5                                       | 0.9                                        | 26.7                                                 | 45.7                                    | (Ho et al., 2016)    |
|                 | Shanghai (China)  | 2013      | Summer | 15.7                                       | 8.9                                        | 11.5                                      | 38.8 <sup>c</sup>                          | 0                                                    | 74.9                                    | (Tao et al., 2016)   |
|                 | Shanghai (China)  | 2013      | Summer | –                                          | 2.4                                        | 0.2                                       | –                                          | 2.2                                                  | 4.8                                     | (Huang et al., 2016) |
|                 |                   |           | Winter | –                                          | 3.9                                        | 0.3                                       | –                                          | 3.8                                                  | 8.0                                     |                      |
|                 | Shanghai (China)  | 2013      | Spring | 6.4                                        | –                                          | –                                         | 4.8                                        | 8.4                                                  | 19.6                                    | (Zhou et al., 2019)  |
|                 |                   |           | Summer | 9.1                                        | –                                          | –                                         | 1.7                                        | 0.9                                                  | 11.7                                    |                      |
|                 |                   |           | Autumn | 15.5                                       | –                                          | –                                         | 2.8                                        | 12.7                                                 | 31.0                                    |                      |
|                 |                   |           | Winter | 27.3                                       | –                                          | –                                         | 7.3                                        | 35.2                                                 | 69.8                                    |                      |
|                 | Shanghai (China)  | 2017–2018 | Winter | 8.6                                        | 16.0                                       | 4.0                                       | 3.7                                        | 3.5                                                  | 35.8                                    | (Liu et al., 2023)   |
|                 | Yangzhou (China)  | 2016      | Summer | 3.6                                        | 1.4                                        | 12.6                                      | –                                          | 0                                                    | 17.6                                    | (Cheng et al., 2020) |
|                 | Yangzhou (China)  | 2015–2016 | Winter | 4.3                                        | 4.9                                        | 15.4                                      | –                                          | 0                                                    | 24.6                                    | (Shen et al., 2017)  |
|                 | Nanjing (China)   | 2017–2018 | Winter | 5.1                                        | 6.6                                        | 3.5                                       | 1.7                                        | 2.4                                                  | 19.3                                    | (Liu et al., 2023)   |
|                 | Nanjing (China)   | 2016      | Spring | 4.2                                        | 7.6                                        | 21.7                                      | –                                          | 0                                                    | 33.5                                    |                      |
|                 | Nanjing (China)   | 2001      | Spring | –                                          | 12.5                                       | 6.7                                       | –                                          | 4.0                                                  | 23.2                                    | (Yang et al., 2005)  |
|                 |                   |           | Autumn | –                                          | 5.5                                        | 3.7                                       | –                                          | 1.7                                                  | 10.9                                    |                      |
| Seoul (Korea)   | 2018              | Spring    | 2.8    | –                                          | 0.3                                        | 1.4                                       | 1.3                                        | 5.8                                                  | (Choi et al., 2020)                     |                      |
|                 |                   | Summer    | 3.4    | –                                          | 0.4                                        | 1.2                                       | 0.8                                        | 5.8                                                  |                                         |                      |
|                 |                   | Autumn    | 2.6    | –                                          | 0.3                                        | 1.3                                       | 0.9                                        | 5.1                                                  |                                         |                      |
|                 |                   | Winter    | 2.3    | –                                          | 0.1                                        | 1.4                                       | 1.9                                        | 5.7                                                  |                                         |                      |
|                 |                   | Annual    | 2.7    | –                                          | 0.3                                        | 1.3                                       | 1.3                                        | 5.6                                                  |                                         |                      |
| Beijing (China) | 2013              | Winter    | 4.3    | 31.0                                       | 14.8                                       | 2.1                                       | 81.0                                       | 133.2                                                | (Ho et al., 2016)                       |                      |
| Xi'an (China)   | 2017–2018         | Winter    | 5.0    | 13.2                                       | 2.4                                        | 1.2                                       | 3.6                                        | 25.4                                                 | (Liu et al., 2023)                      |                      |
| Xi'an (China)   | 2013              | Winter    | 3.8    | 24.7                                       | 12.6                                       | 2.0                                       | 62.2                                       | 105.3                                                | (Ho et al., 2016)                       |                      |

|                                 |                                                                      |           |                   |                |                  |       |                   |       |                          |                           |
|---------------------------------|----------------------------------------------------------------------|-----------|-------------------|----------------|------------------|-------|-------------------|-------|--------------------------|---------------------------|
|                                 | Xi'an (China)                                                        | 2008–2009 | Spring            | – <sup>b</sup> | 16.9             | 9.7   | –                 | 6.0   | 32.6                     | (Ho et al., 2015)         |
|                                 |                                                                      |           | Summer            | –              | 6.2              | 3.8   | –                 | 1.6   | 11.6                     |                           |
|                                 |                                                                      |           | Autumn            | –              | 14.7             | 8.4   | –                 | 4.5   | 27.6                     |                           |
|                                 |                                                                      |           | Winter            | –              | 22.3             | 11.5  | –                 | 6.8   | 40.6                     |                           |
| Suburban                        | Shanghai (China)                                                     | 2018      | Summer            | 6.3            | 15.0             | –     | 20.4              | 3.9   | 45.6                     | (Du et al., 2021)         |
|                                 | Guangzhou (China)                                                    | 2021      | Winter            | 4.8            | 11.3             | 6.2   | 7.4               | 22.7  | 52.4                     | (Shu et al., 2023)        |
|                                 | Xuzhou (China)                                                       | 2015–2016 | Winter            | 12.7           | 111.0            | 112.0 | 8.5 <sup>c</sup>  | 4.8   | 249.0                    | (Yang et al., 2023)       |
|                                 |                                                                      |           | Spring            | 15.2           | 109.0            | 41.0  | 10.5 <sup>c</sup> | 16.7  | 192.4                    |                           |
|                                 |                                                                      |           | Summer            | 16.2           | 49.7             | 14.7  | 11.3 <sup>c</sup> | 22.8  | 114.7                    |                           |
|                                 |                                                                      |           | Autumn            | 13.9           | 53.0             | 14.3  | 6.9 <sup>c</sup>  | 15.6  | 103.7                    |                           |
|                                 | Annual                                                               | 14.6      | 80.8              | 52.0           | 9.7 <sup>c</sup> | 14.9  | 172.0             |       |                          |                           |
| Beijing (China)                 | 2017                                                                 | Winter    | 1.2               | 23.3           | 11.1             | 0.4   | 8.9               | 44.9  | (Wang et al., 2022)      |                           |
| Rural                           | Guiyang, puding (China)                                              | 2017–2018 | Winter            | 8.8            | 20.6             | 3.2   | 0.1               | 4.5   | 37.2                     | (Liu et al., 2023)        |
|                                 | Baoding (China)                                                      | 2019–2020 | Winter            | 59.6           | 20.4             | –     | 79.1              | 170.7 | 329.8                    | (Feng et al., 2022)       |
|                                 | Egbert (Canada)                                                      | 2010      | Autumn            | 0.1            | –                | –     | 1.0 <sup>c</sup>  | 0     | 1.1                      | (Vandenboer et al., 2012) |
| Forest                          | Nanling (China)                                                      | 2016–2017 | Summer            | 5.0            | 11.9             | –     | 1.7               | 2.1   | 20.7                     | (Liu et al., 2018)        |
|                                 |                                                                      |           | Autumn            | 2.4            | 8.8              | –     | 1.1               | 0.1   | 12.4                     |                           |
| Coastal, Marine, or polar areas | Qingdao (China)                                                      | 2018      | Winter            | 58.7           | 8.5              | 2.7   | 8.4               | 52.4  | 130.7                    | (Liu et al., 2022b)       |
|                                 |                                                                      | 2019      | Winter            | 86.3           | 6.9              | 2.4   | 8.7               | 28.6  | 132.9                    |                           |
|                                 | Zonguldak (Turkey)                                                   | 2006–2007 | Winter            | 4.6            | 4.5              | 4.4   | 4.2               | 102.1 | 119.8                    | (Akyüz, 2008)             |
|                                 |                                                                      |           | Summer            | 2.8            | 2.3              | 2.2   | 2.8               | 66.6  | 76.7                     |                           |
|                                 | Huaniao Island (China)                                               | 2016      | Summer            | 4.0            | –                | –     | 8.7 <sup>c</sup>  | 0     | 12.7                     | (Zhou et al., 2019)       |
|                                 | The coastline of the East China Sea, South China Sea, and Yellow Sea | 2018      | Spring            | 30.1           | –                | –     | –                 | –     | –                        | (Chen et al., 2022a)      |
|                                 | Northwest Atlantic                                                   | 2020      | Winter (non-cold) | 3.91           | –                | –     | –                 | –     | –                        | (Corral et al., 2022)     |
|                                 |                                                                      |           | Winter (cold)     | 7.39           | –                | –     | –                 | –     | –                        |                           |
|                                 |                                                                      |           | Summer            | 0.63           | –                | –     | –                 | –     | –                        |                           |
|                                 | South of the southern boundary of the Antarctic Circumpolar Current  | 2015      | Winter            | 2.02           | 0.34             | 0.12  | 3.84              | 0.81  | 7.13                     | (Dall'osto et al., 2019)  |
| North of the southern           | 2015                                                                 | Winter    | 0.7               | 0.05           | 0.01             | 0.61  | 0.12              | 1.49  | (Dall'osto et al., 2019) |                           |

|                                               |  |  |  |  |  |  |  |  |  |
|-----------------------------------------------|--|--|--|--|--|--|--|--|--|
| boundary of the Antarctic Circumpolar Current |  |  |  |  |  |  |  |  |  |
|-----------------------------------------------|--|--|--|--|--|--|--|--|--|

<sup>a</sup>It indicates the total concentrations of other aminiums including triethylaminium (TEAH<sup>+</sup>), PAH<sup>+</sup>, BAH<sup>+</sup>, PYRH<sup>+</sup>, morpholine (MORH<sup>+</sup>), or monoethanolaminium (MEOH<sup>+</sup>).

<sup>b</sup>The symbol “-” indicates no data.

<sup>c</sup>It indicates the sum of TMAH<sup>+</sup> and DEAH<sup>+</sup> concentrations.



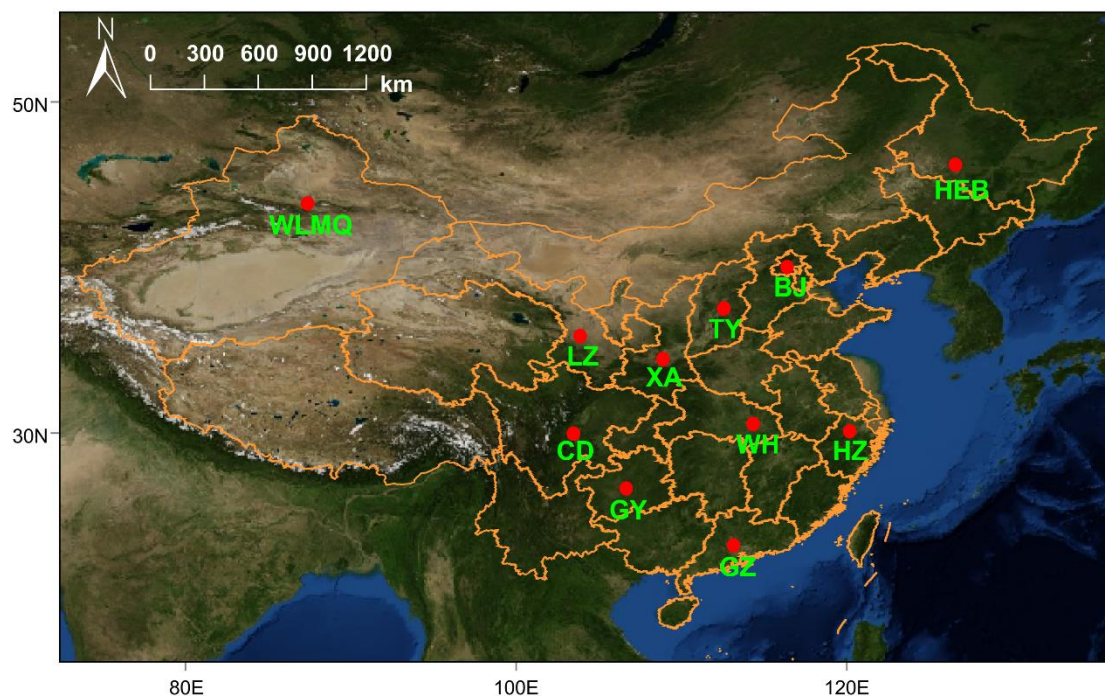

**Figure S1.** The locations of the sampling sites. The map was derived from ©MeteoInfoMap (version 3.3.0) (Chinese Academy of Meteorological Sciences, China).

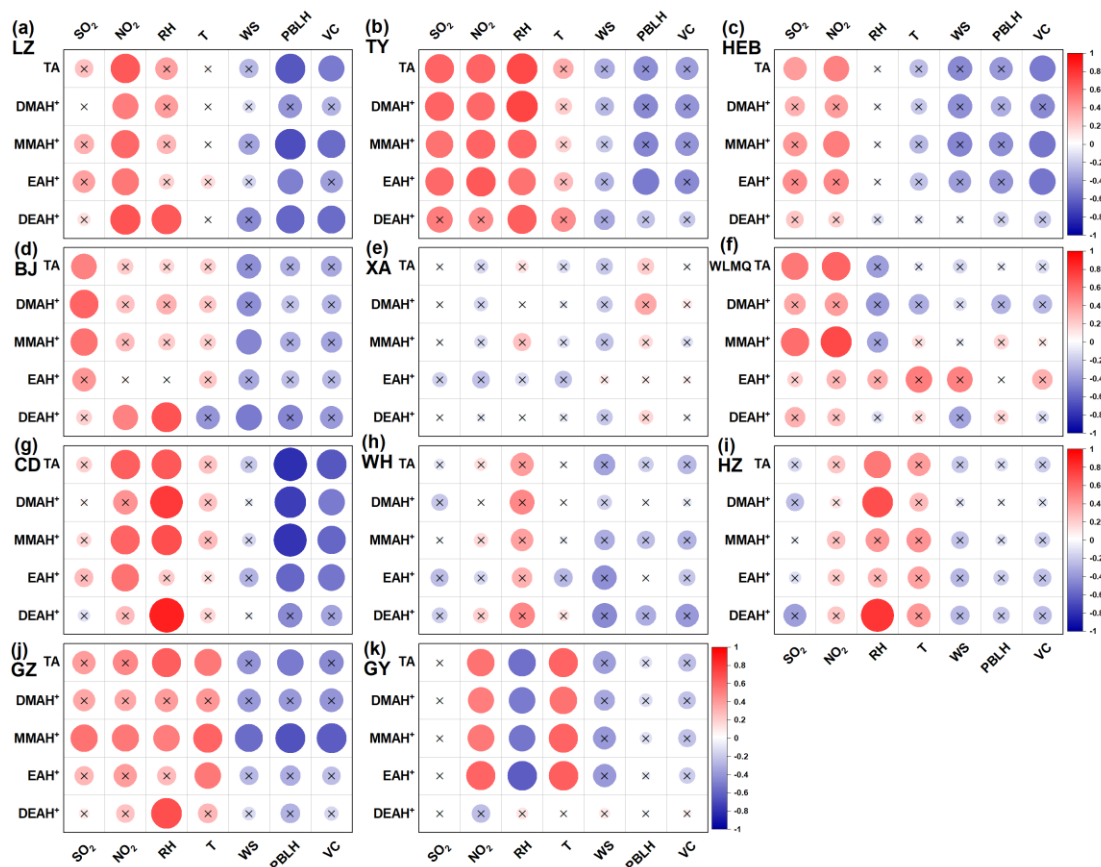

**Figure S2.** Diagrams presenting correlations between the concentrations of various aminiums and other parameters at (a–k) different sites. The colors of the different solid circles indicate different correlation coefficients  $r$ . The size of the solid circle indicates the significance of the correlation between the two corresponding parameters: the larger circle indicates that the correlation is more significant, while the symbol “x” indicates that the  $P$ -value is greater than 0.05.

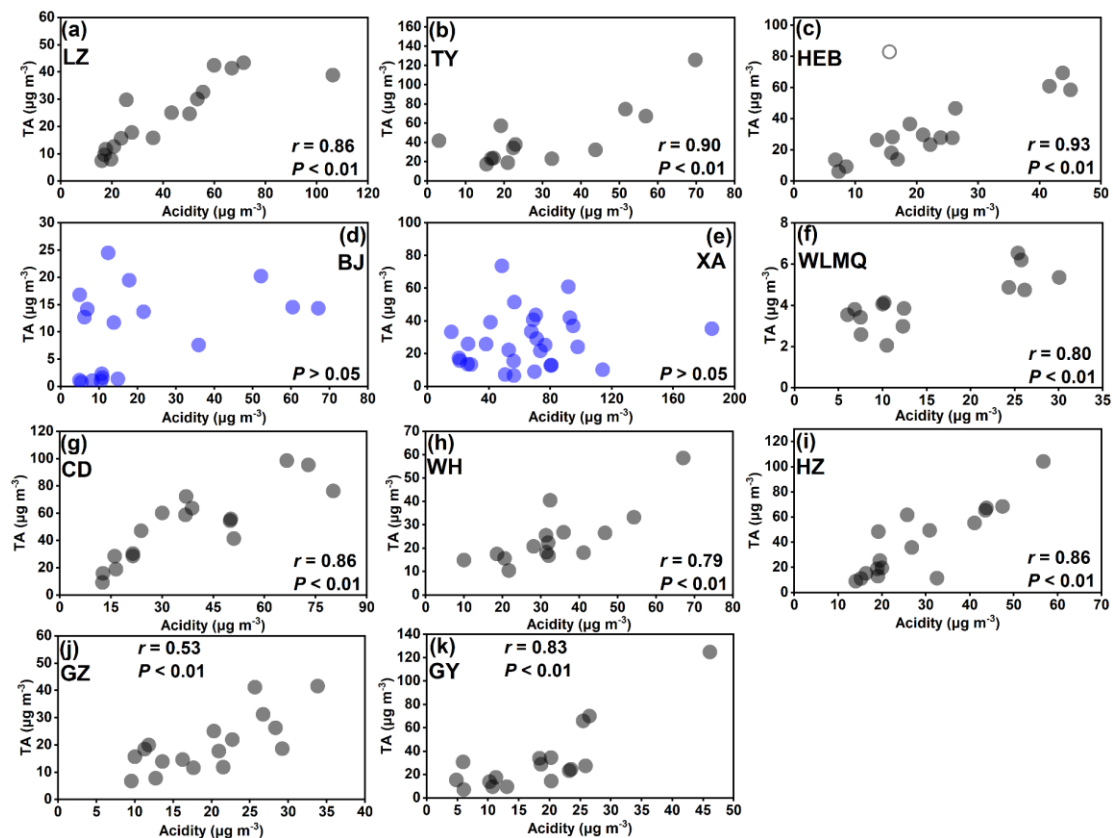

**Figure S3.** Concentration of TA as a function of acidity (expressed as  $(\text{NO}_3^- + 2\text{SO}_4^{2-}) - \text{NH}_4^+$ ) (Feng et al., 2022) at the (a) LZ, (b) TY, (c) HEB, (d) BJ, (e) XA, (f) WLMQ, (g) CD, (h) WH, (i) HZ, (j) GZ, and (k) GY sites. Open circles represent outliers.

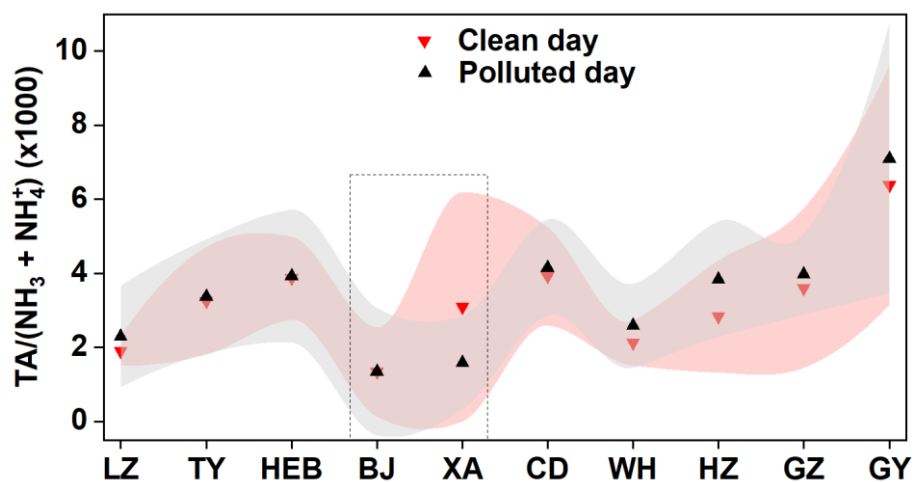

**Figure S4.** Mean  $\text{TA}/(\text{NH}_3 + \text{NH}_4^+)$  ratios on clean and polluted days in different cities. The triangle and the shaded area represent the mean value and the corresponding standard deviation, respectively. The concentration of  $\text{NH}_3$  was predicated using ISORROPIA-II (Guo et al., 2015).

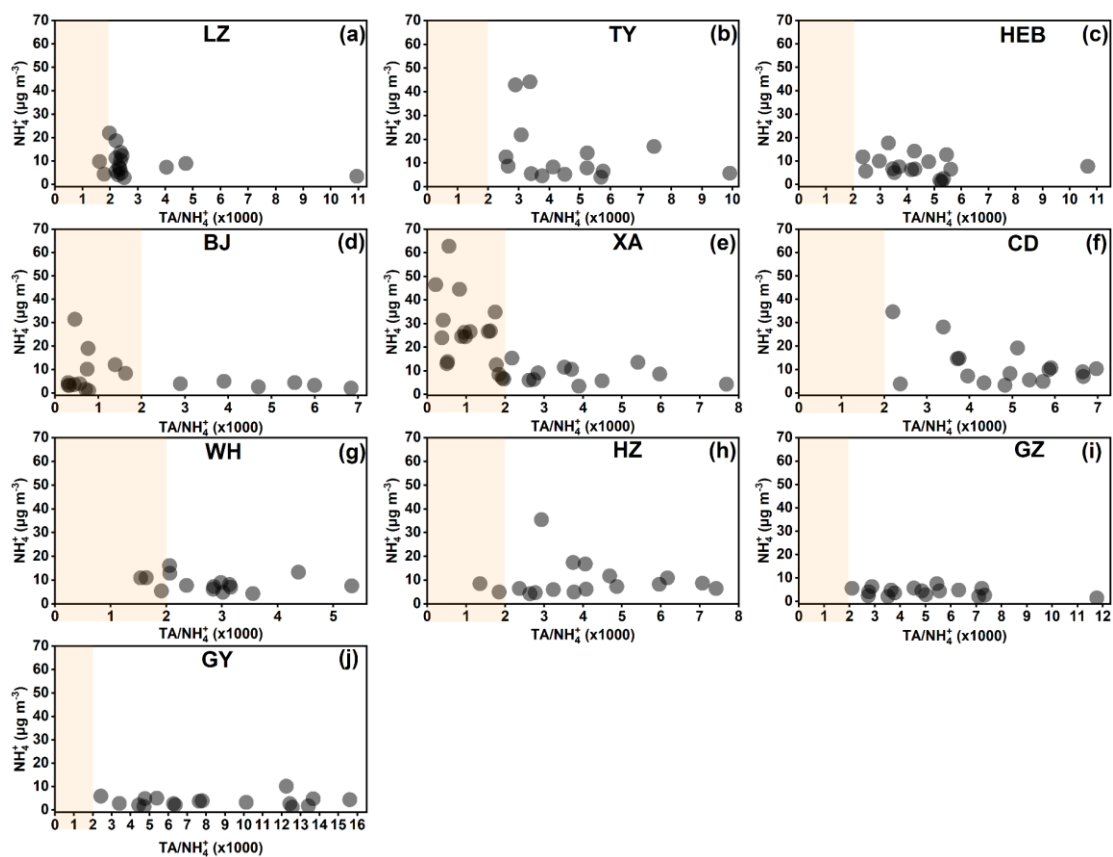

**Figure S5.** Scatterplots of the mass concentration of  $\text{NH}_4^+$  with the ratio of TA to  $\text{NH}_4^+$  at the (a) LZ, (b) TY, (c) HEB, (d) BJ, (e) XA, (f) WLMQ, (g) CD, (h) WH, (i) HZ, (j) GZ, and (k) GY sites.

## REFERENCES

- Akyüz, M.: Simultaneous determination of aliphatic and aromatic amines in ambient air and airborne particulate matters by gas chromatography-mass spectrometry, *Atmospheric Environment*, 42, 3809-3819, <https://doi.org/10.1016/j.atmosenv.2007.12.057>, 2008.
- Chen, D., Yao, X., Chan, C. K., Tian, X., Chu, Y., Clegg, S. L., Shen, Y., Gao, Y., and Gao, H.: Competitive Uptake of Dimethylamine and Trimethylamine against Ammonia on Acidic Particles in Marine Atmospheres, *Environmental Science & Technology*, 56, 5430-5439, [10.1021/acs.est.1c08713](https://doi.org/10.1021/acs.est.1c08713), 2022a.
- Chen, Y., Lin, Q., Li, G., and An, T.: A new method of simultaneous determination of atmospheric amines in gaseous and particulate phases by gas chromatography-mass spectrometry, *J Environ Sci (China)*, 114, 401-411, [10.1016/j.jes.2021.09.027](https://doi.org/10.1016/j.jes.2021.09.027), 2022b.
- Cheng, G., Hu, Y., Sun, M., Chen, Y., Chen, Y., Zong, C., Chen, J., and Ge, X.: Characteristics and potential source areas of aliphatic amines in PM<sub>2.5</sub> in Yangzhou, China, *Atmospheric Pollution Research*, 11, 296-302, <https://doi.org/10.1016/j.apr.2019.11.002>, 2020.
- Choi, N. R., Lee, J. Y., Ahn, Y. G., and Kim, Y. P.: Determination of atmospheric amines at Seoul, South Korea via gas chromatography/tandem mass spectrometry, *Chemosphere*, 258, 127367, [10.1016/j.chemosphere.2020.127367](https://doi.org/10.1016/j.chemosphere.2020.127367), 2020.
- Corral, A. F., Choi, Y., Collister, B. L., Crosbie, E., Dadashazar, H., DiGangi, J. P.,

- Diskin, G. S., Fenn, M., Kirschler, S., Moore, R. H., Nowak, J. B., Shook, M. A., Stahl, C. T., Shingler, T., Thornhill, K. L., Voigt, C., Ziemba, L. D., and Sorooshian, A.: Dimethylamine in cloud water: a case study over the northwest Atlantic Ocean, *Environmental Science: Atmospheres*, 2, 1534-1550, 10.1039/D2EA00117A, 2022.
- Dall'Osto, M., Airs, R. L., Beale, R., Cree, C., Fitzsimons, M. F., Beddows, D., Harrison, R. M., Ceburnis, D., O'Dowd, C., Rinaldi, M., Paglione, M., Nenes, A., Decesari, S., and Simó, R.: Simultaneous Detection of Alkylamines in the Surface Ocean and Atmosphere of the Antarctic Sympagic Environment, *ACS Earth and Space Chemistry*, 3, 854-862, 10.1021/acsearthspacechem.9b00028, 2019.
- Du, W., Wang, X., Yang, F., Bai, K., Wu, C., Liu, S., Wang, F., Lv, S., Chen, Y., Wang, J., Liu, W., Wang, L., Chen, X., and Wang, G.: Particulate Amines in the Background Atmosphere of the Yangtze River Delta, China: Concentration, Size Distribution, and Sources, *Advances in Atmospheric Sciences*, 38, 1128-1140, 10.1007/s00376-021-0274-0, 2021.
- Feng, X., Wang, C., Feng, Y., Cai, J., Zhang, Y., Qi, X., Li, Q., Li, J., and Chen, Y.: Outbreaks of Ethyl-Amines during Haze Episodes in North China Plain: A Potential Source of Amines from Ethanol Gasoline Vehicle Emission, *Environmental Science & Technology Letters*, 9, 306-311, 10.1021/acs.estlett.2c00145, 2022.
- Gani, S., Bhandari, S., Seraj, S., Wang, D. S., Patel, K., Soni, P., Arub, Z., Habib, G.,

- Hildebrandt Ruiz, L., and Apte, J. S.: Submicron aerosol composition in the world's most polluted megacity: the Delhi Aerosol Supersite study, *Atmos. Chem. Phys.*, 19, 6843-6859, 10.5194/acp-19-6843-2019, 2019.
- Guo, H. Y., Xu, L., Bougiatioti, A., Cerully, K. M., Capps, S. L., Hite Jr, J., Carlton, A., Lee, S. H., Bergin, M., and Ng, N.: Fine-particle water and pH in the southeastern United States, *Atmos. Chem. Phys.*, 15, 5211-5228. <https://doi.org/5210.5194/acp-5215-5211-2015>, 2015.
- Ho, K.-F., Ho, S. S. H., Huang, R.-J., Chuang, H.-C., Cao, J.-J., Han, Y., Lui, K.-H., Ning, Z., Chuang, K.-J., Cheng, T.-J., Lee, S.-C., Hu, D., Wang, B., and Zhang, R.: Chemical composition and bioreactivity of PM<sub>2.5</sub> during 2013 haze events in China, *Atmospheric Environment*, 126, 162-170, <https://doi.org/10.1016/j.atmosenv.2015.11.055>, 2016.
- Ho, K. F., Ho, S. S. H., Huang, R.-J., Liu, S. X., Cao, J.-J., Zhang, T., Chuang, H.-C., Chan, C. S., Hu, D., and Tian, L.: Characteristics of water-soluble organic nitrogen in fine particulate matter in the continental area of China, *Atmospheric Environment*, 106, 252-261, <https://doi.org/10.1016/j.atmosenv.2015.02.010>, 2015.
- Huang, S., Song, Q., Hu, W., Yuan, B., Liu, J., Jiang, B., Li, W., Wu, C., Jiang, F., Chen, W., Wang, X., and Shao, M.: Chemical composition and sources of amines in PM<sub>2.5</sub> in an urban site of PRD, China, *Environmental Research*, 212, 113261, <https://doi.org/10.1016/j.envres.2022.113261>, 2022.
- Huang, X., Deng, C., Zhuang, G., Lin, J., and Xiao, M.: Quantitative analysis of



- aliphatic amines in urban aerosols based on online derivatization and high performance liquid chromatography, *Environmental Science: Processes & Impacts*, 18, 796-801, 10.1039/C6EM00197A, 2016.
- Liu, F., Zhang, G., Lian, X., Fu, Y., Lin, Q., Yang, Y., Bi, X., Wang, X., Peng, P. a., and Sheng, G.: Influence of meteorological parameters and oxidizing capacity on characteristics of airborne particulate amines in an urban area of the Pearl River Delta, China, *Environmental Research*, 212, 113212, <https://doi.org/10.1016/j.envres.2022.113212>, 2022a.
- Liu, F., Bi, X., Zhang, G., Lian, X., Fu, Y., Yang, Y., Lin, Q., Jiang, F., Wang, X., Peng, P. a., and Sheng, G.: Gas-to-particle partitioning of atmospheric amines observed at a mountain site in southern China, *Atmospheric Environment*, 195, 1-11, <https://doi.org/10.1016/j.atmosenv.2018.09.038>, 2018.
- Liu, T., Xu, Y., Sun, Q.-B., Xiao, H.-W., Zhu, R.-G., Li, C.-X., Li, Z.-Y., Zhang, K.-Q., Sun, C.-X., and Xiao, H.-Y.: Characteristics, Origins, and Atmospheric Processes of Amines in Fine Aerosol Particles in Winter in China, *J. Geophys. Res.: Atmos.*, 128, e2023JD038974, <https://doi.org/10.1029/2023JD038974>, 2023.
- Liu, Z., Li, M., Wang, X., Liang, Y., Jiang, Y., Chen, J., Mu, J., Zhu, Y., Meng, H., Yang, L., Hou, K., Wang, Y., and Xue, L.: Large contributions of anthropogenic sources to amines in fine particles at a coastal area in northern China in winter, *Science of The Total Environment*, 839, 156281, <https://doi.org/10.1016/j.scitotenv.2022.156281>, 2022b.

- Shen, W., Ren, L., Zhao, Y., Zhou, L., Dai, L., Ge, X., Kong, S., Yan, Q., Xu, H., Jiang, Y., He, J., Chen, M., and Yu, H.: C1-C2 alkyl aminiums in urban aerosols: Insights from ambient and fuel combustion emission measurements in the Yangtze River Delta region of China, *Environmental pollution*, 230, 12-21, <https://doi.org/10.1016/j.envpol.2017.06.034>, 2017.
- Shu, Q., Pei, C., Lin, X., Hong, D., Lai, S., and Zhang, Y.: Variations of aminiums in fine particles at a suburban site in Guangzhou, China: Importance of anthropogenic and natural emissions, *Particuology*, 80, 140-147, <https://doi.org/10.1016/j.partic.2022.11.019>, 2023.
- Tao, Y., Ye, X., Jiang, S., Yang, X., Chen, J., Xie, Y., and Wang, R.: Effects of amines on particle growth observed in new particle formation events, *Journal of Geophysical Research: Atmospheres*, 121, 324-335, <https://doi.org/10.1002/2015JD024245>, 2016.
- VandenBoer, T. C., Markovic, M. Z., Petroff, A., Czar, M. F., Borduas, N., and Murphy, J. G.: Ion chromatographic separation and quantitation of alkyl methylamines and ethylamines in atmospheric gas and particulate matter using preconcentration and suppressed conductivity detection, *J Chromatogr A*, 1252, 74-83, [10.1016/j.chroma.2012.06.062](https://doi.org/10.1016/j.chroma.2012.06.062), 2012.
- Wang, M., Wang, Q., Ho, S. S. H., Li, H., Zhang, R., Ran, W., Qu, L., Lee, S. C., and Cao, J.: Chemical characteristics and sources of nitrogen-containing organic compounds at a regional site in the North China Plain during the transition period of autumn and winter, *Sci Total Environ*, 812, 151451,

10.1016/j.scitotenv.2021.151451, 2022.

Yang, H., Yu, J. Z., Ho, S. S. H., Xu, J., Wu, W.-S., Wan, C. H., Wang, X., Wang, X., and Wang, L.: The chemical composition of inorganic and carbonaceous materials in PM<sub>2.5</sub> in Nanjing, China, *Atmospheric Environment*, 39, 3735-3749, <https://doi.org/10.1016/j.atmosenv.2005.03.010>, 2005.

Yang, X.-Y., Cao, F., Fan, M.-Y., Lin, Y.-C., Xie, F., and Zhang, Y.-L.: Seasonal variations of low molecular alkyl amines in PM<sub>2.5</sub> in a North China Plain industrial city: Importance of secondary formation and combustion emissions, *Science of The Total Environment*, 857, 159371, <https://doi.org/10.1016/j.scitotenv.2022.159371>, 2023.

Zhou, S., Li, H., Yang, T., Chen, Y., Deng, C., Gao, Y., Chen, C., and Xu, J.: Characteristics and sources of aerosol aminiums over the eastern coast of China: insights from the integrated observations in a coastal city, adjacent island and surrounding marginal seas, *Atmospheric Chemistry and Physics*, 19, 10447-10467, [10.5194/acp-19-10447-2019](https://doi.org/10.5194/acp-19-10447-2019), 2019.
